# Supplementary material
Source: PubMed Central journal article supplement (PMC2246612)
Supplement: 7401113-s1.pdf [file 7401113-s1.pdf]

**Table S1** | Yeast strains used in this study

---

| <b>Strain</b>                  | <b>Genotype</b>                                                                                                         |
|--------------------------------|-------------------------------------------------------------------------------------------------------------------------|
| JSY7452*                       | <i>MAT<math>\alpha</math></i> <i>ade2-1 leu2-3 his3-11,15 trp1-1 ura3-1 can1-100</i>                                    |
| JSY7453*                       | <i>MAT<math>\alpha</math></i> <i>ade2-1 leu2-3 his3-11,15 trp1-1 ura3-1 can1-100 mfb1::HIS3</i>                         |
| JSY8272                        | <i>MAT<math>\alpha</math></i> <i>ade2-1 leu2-3 his3-11,15 trp1-1 ura3-1 can1-100 tom70::TRP1</i>                        |
| JSY8275                        | <i>MAT<math>\alpha</math></i> <i>ade2-1 leu2-3 his3-11,15 trp1-1 ura3-1 can1-100 mfb1::HIS3 tom70::TRP1</i>             |
| JSY8278                        | <i>MAT<math>\alpha</math></i> <i>ade2-1 leu2-3 his3-11,15 trp1-1 ura3-1 can1-100 tom71::HIS3</i>                        |
| JSY8281                        | <i>MAT<math>\alpha</math></i> <i>ade2-1 leu2-3 his3-11,15 trp1-1 ura3-1 can1-100 mfb1::HIS3 tom71::HIS3</i>             |
| JSY8283                        | <i>MAT<math>\alpha</math></i> <i>ade2-1 leu2-3 his3-11,15 trp1-1 ura3-1 can1-100 tom70::TRP1 tom71::HIS3</i>            |
| JSY8286                        | <i>MAT<math>\alpha</math></i> <i>ade2-1 leu2-3 his3-11,15 trp1-1 ura3-1 can1-100 mfb1::HIS3 tom70::TRP1 tom71::HIS3</i> |
| JSY8323                        | <i>MAT<math>\alpha</math></i> <i>ade2-1 leu2-3 his3-11,15 trp1-1 ura3-1 can1-100 tom20::TRP1</i>                        |
| <i>tom5<math>\Delta</math></i> | <i>MAT<math>\alpha</math></i> <i>ade2-1 leu2-3 his3-11,15 trp1-1 ura3-1 can1-100 tom5::CgHIS3</i>                       |
| MNMS-1C                        | <i>MAT<math>\alpha</math></i> <i>ade2-1 leu2-3 his3-11,15 trp1-1 ura3-1 can1-100 mas17::HIS3 [pGAL:MAS17(URA3)]</i>     |

---

\*These strains have been used previously (Kondo-Okamoto *et al*, 2006). Gene disruptions were confirmed by PCR. *tom5 $\Delta$*  (Esaki *et al*, 2004) and MNMS-1C (Nakai *et al*, 1995) were provided kindly by T. Endo (Nagoya University, Nagoya, Japan).

---

**Table S2** | Plasmids used in this study

| <b>Plasmid</b> | <b>Construct name</b>             | <b>Insert</b>                                                                                             |
|----------------|-----------------------------------|-----------------------------------------------------------------------------------------------------------|
| B1220*         | pYX142- <i>mtGFP</i> <sup>+</sup> | <i>N. crassa</i> ATP9(1-69) + brighter GFP                                                                |
| B1641*         | pYX142- <i>mtRFPm</i>             | <i>N. crassa</i> ATP9(1-69) + monomeric DsRed                                                             |
| B1788*         | pRS416- <i>MFB1-3HA</i>           | 438 bp 5' + <i>MFB1(1-465)</i> + 3xHA + 400 bp 3'                                                         |
| B1800*         | pRS416- <i>MFB1(1-465)-GFP</i>    | 438 bp 5' + GAATTC + <i>MFB1(1-465)</i> + <i>GFP</i> <sup>+</sup> + 400 bp 3'                             |
| B1865*         | pYX142- <i>MFB1(1-465)-3HA</i>    | <i>MFB1(1-465)</i> + 3xHA                                                                                 |
| B1870          | pRS416- <i>MFB1</i>               | 438 bp 5' + <i>MFB1(1-465)</i> + 400 bp 3'                                                                |
| B2055*         | pRS416- <i>TMS-MFB1-3HA-GFP</i>   | 438 bp 5' + GAATTC + <i>TOM20(1-50)</i> + <i>MFB1(2-465)</i> + 3xHA + <i>GFP</i> <sup>+</sup> + 400 bp 3' |
| B2119          | pRS415- <i>TOM70</i>              | 476 bp 5' + <i>TOM70(1-617)</i> + 267 bp 3'                                                               |
| B2120          | pRS415- <i>TOM71</i>              | 342 bp 5' + <i>TOM71(1-639)</i> + 347 bp 3'                                                               |
| B2149          | pRS415- <i>TOM70(R171A)</i>       | 476 bp 5' + <i>TOM70(1-617)(R171A)</i> + 267 bp 3'                                                        |
| B2169          | pRS415- <i>TOM70(1-575)</i>       | 476 bp 5' + <i>TOM70(1-575)</i> + 267 bp 3'                                                               |
| B2176          | pRS415- <i>TOM70(1-605)</i>       | 476 bp 5' + <i>TOM70(1-605)</i> + 267 bp 3'                                                               |
| B2267          | pRS415- <i>TOM71(ΔTPR1-3)</i>     | 342 bp 5' + <i>TOM71(1-125)</i> + <i>TOM71(209-639)</i> + 347 bp 3'                                       |
| B2268          | pRS415- <i>TOM70(HCS)</i>         | 476 bp 5' + <i>TOM70(1-78)</i> + <i>LEVLFGGPAS</i> + <i>TOM70(79-617)</i> + 267 bp 3'                     |
| B2272          | pRS415- <i>TOM71(R200A)</i>       | 342 bp 5' + <i>TOM71(1-639)(R200A)</i> + 347 bp 3'                                                        |
| B2285          | pRS415- <i>TOM70(ΔTPR1-3)</i>     | 476 bp 5' + <i>TOM70(1-97)</i> + <i>TOM70(179-617)</i> + 267 bp 3'                                        |
| B2286          | pRS415- <i>TOM71(1-597)</i>       | 342 bp 5' + <i>TOM71(1-597)</i> + 347 bp 3'                                                               |
| B2288          | pRS415- <i>TOM71(1-627)</i>       | 342 bp 5' + <i>TOM71(1-627)</i> + 347 bp 3'                                                               |
| B2289          | pRS425- <i>TOM71</i>              | 342 bp 5' + <i>TOM71(1-639)</i> + 347 bp 3'                                                               |
| KOB1           | pRS314- <i>MFB1-3HA</i>           | 438 bp 5' + <i>MFB1(1-465)</i> + 3xHA + 400 bp 3'                                                         |
| KOB2           | pRS314- <i>MFB1(1-465)-GFP</i>    | 438 bp 5' + GAATTC + <i>MFB1(1-465)</i> + <i>GFP</i> <sup>+</sup> + 400 bp 3'                             |

\*These plasmids have been used previously (Kondo-Okamoto *et al*, 2006). Constructs cloned in pYX142 are expressed under the control of the strong constitutive *TPI* promoters. All PCR-amplified fragments were verified by sequencing. Brighter GFP and monomeric DsRed variants were provided kindly by M. Niederweis (Friedrich-Alexander-Universität Erlangen-Nürnberg, Erlangen, Germany) and R. Tsien (University of California, San Diego, San Diego, CA, USA), respectively.

## SUPPLEMENTAL METHODS

**Immunoprecipitation.** Physical interactions of Mfb1 with Tom71, Tom70, Tom20, Tom22, and Tom40 were examined by immunoprecipitation as described previously (Kondo-Okamoto *et al*, 2006). Mitochondria isolated from *mfb1Δ* cells expressing Mfb1-3HA or wild-type Mfb1 (0.4 mg of protein, Fig 1A), or *mfb1Δ* and *mfb1Δ tom70Δ* cells overexpressing Mfb1-3HA (0.6 mg of protein, Fig 1B) were pelleted, resuspended in 0.6 ml lysis buffer (50 mM Tris-HCl [pH 7.5], 100 mM NaCl, 0.1 mM EDTA, 0.2% Triton X-100) containing 0.5% protease inhibitor cocktail (PIC) (Calbiochem, 539134), incubated at 4°C for 15 min with gentle agitation, and subjected to centrifugation (18,000 g) at 4°C for 10 min. The supernatant fractions were transferred to a new tube containing 20 μl Anti-HA Agarose Conjugate (Sigma, A2095), and incubated at 4°C for 2 h with gentle agitation. The beads were washed twice with 0.6 ml lysis buffer, and once with 0.6 ml PBS, and collected by centrifugation (12,000 g) at 4°C for 1 min. The proteins were eluted with SDS-sample buffer lacking β-mercaptoethanol (BME) at 65°C for 8 min followed by addition of BME (0.9 M), and analyzed by Western blotting. The mitochondrial extract inputs (I) and eluted immunoprecipitates (E) loaded per lane were 2% and 50% (Fig 1A), or 2% and 33% (Fig 1B) of the total extracts subjected to incubation with anti-HA-conjugated agarose, respectively.

***In vitro* binding assays.** Binding of Mfb1 to isolated mitochondria was investigated by sedimentation as described previously (Kondo-Okamoto *et al*, 2006). Mitochondria (60 μg of protein) isolated from *mfb1Δ tom70Δ tom71Δ* cells expressing Tom70 or Tom70(HCS), a variant with a HRV 3C processing site (Fig 5A), *mfb1Δ tom70Δ* cells expressing Tom70 or Tom70(HCS) (Fig 5B), or *mfb1Δ tom70Δ* cells expressing Tom70 or Tom71 at 2-3 (Tom71 ↑) and 10-15 (Tom71 ↑↑) fold higher levels (Fig 5C) were pretreated with or without HRV 3C Protease (80 U/ml) (Novagen) in 0.5 ml HRV 3C Protease Cleavage Buffer (50 mM Tris-HCl, [pH 7.5], 150 mM NaCl, 0.6 M sorbitol) at 4°C for 30 min or proteinase K (PK) (50 μg/ml) in 0.5 ml HS buffer (20 mM HEPES-KOH [pH 7.4], 0.6 M sorbitol) on ice for 15 min followed by the addition of PMSF (1 mM) on ice for 5 min. Samples were subjected to centrifugation (18,000 g) at 4°C for 10 min. The mitochondrial pellet was washed twice in 0.5 ml HS buffer containing 1 mM PMSF and 0.4% PIC, and collected by centrifugation (18,000 g) at 4°C for 10 min. Mitochondria were resuspended in 0.4 ml of a PMS (1.6 mg of protein) fraction isolated from *mfb1Δ tom70Δ tom71Δ* cells overexpressing Mfb1-3HA, and incubated at 4°C for 20 min. 0.1 ml of the reaction mixture was layered onto a 0.5 ml sucrose cushion (25% sucrose, 20 mM HEPES-KOH [pH 7.4], 1mM PMSF, 0.4% PIC), and subjected to centrifugation (12,500 g) at 4°C for 10 min. After collecting the supernatant, the sucrose

cushion was discarded, and the mitochondrial pellet was washed once in 0.2 ml HS buffer containing 1 mM PMSF and collected by centrifugation (12,500 g) at 4°C for 10 min. The mitochondrial pellet fractions (20 µg of protein per lane) were analyzed.

**Immunoblot analysis.** Proteins were analyzed by immunoblotting with antibodies specific for: Porin (1:20,000) and 3-PGK (1:10,000) from Molecular Probes (1 mg/ml); HA (1:1,000) from the University of Utah Core Facility; Mge1 (1:5,000), Tom40 (1:20,000) and Tom70 (1:10,000), gifts from T. Endo (Nagoya University, Nagoya, Japan); Tom20 (1:10,000) and Tim44 (1:10,000), gifts from W. Neupert and K. Hell (Ludwig-Maximilians-Universität München, Munich, Germany); Tom71 (1:500), a gift from D. Rapaport (Universität Tübingen, Tübingen, Germany); and Tom22 (1:1,000), a gift from N. Pfanner (Universität Freiburg, Freiburg, Germany).

#### **REFERENCES:**

Esaki M, Shimizu H, Ono T, Yamamoto H, Kanamori T, Nishikawa S, Endo T (2004) Mitochondrial protein import. Requirement of presequence elements and tom components for precursor binding to the TOM complex. *J Biol Chem* **279**: 45701-45707

Kondo-Okamoto N, Ohkuni K, Kitagawa K, McCaffery JM, Shaw JM, Okamoto K (2006) The novel F-box protein Mfb1p regulates mitochondrial connectivity and exhibits asymmetric localization in yeast. *Mol Biol Cell* **17**: 3756-3767

Nakai M, Kinoshita K, Endo T (1995) Mitochondrial receptor complex protein. The intermembrane space domain of yeast MAS17 is not essential for its targeting or function. *J Biol Chem* **270**: 30571-30575

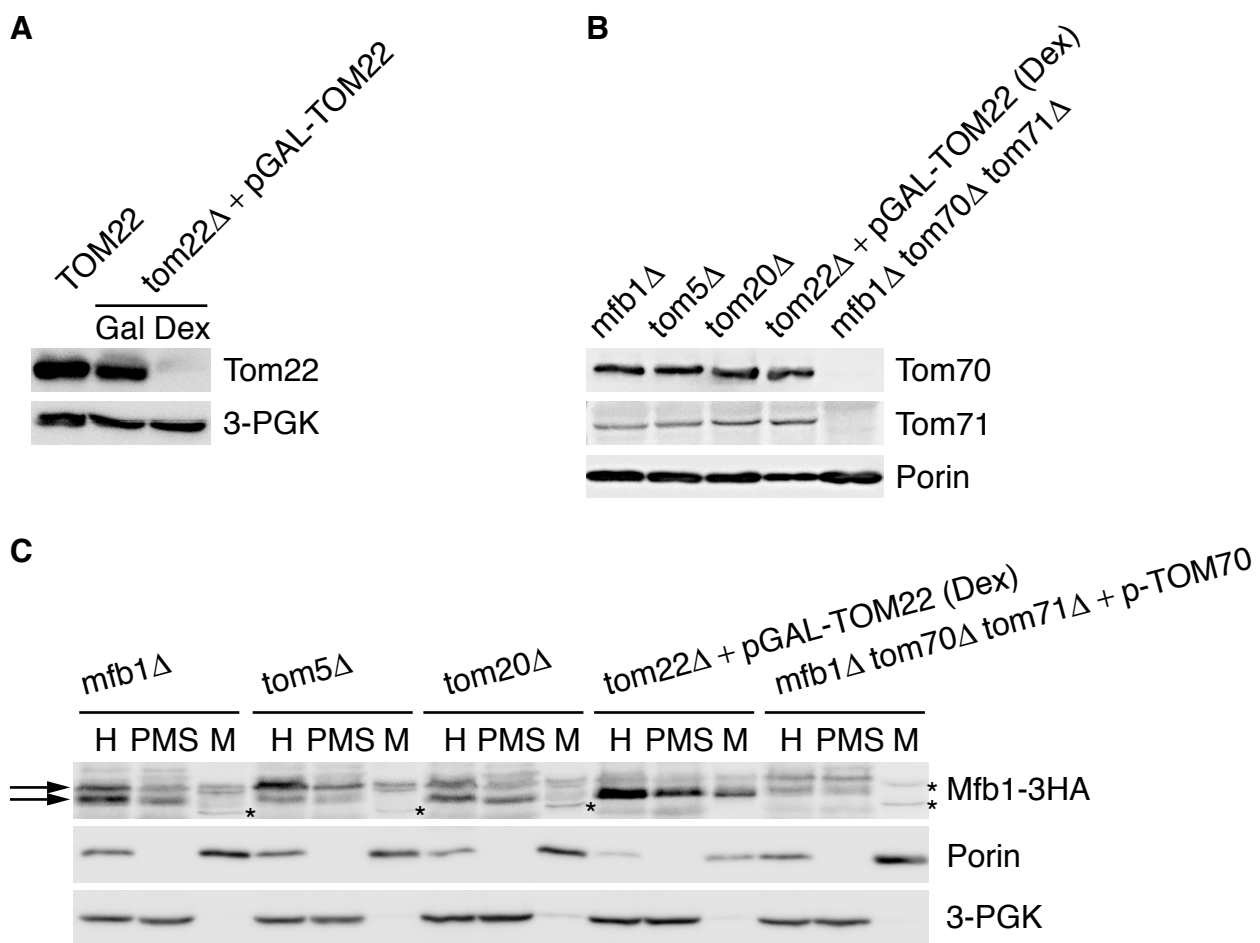

**Fig S1** | Subcellular fractionation assays for Mfb1-3HA localization in cells lacking Tom5 or Tom20, and depleting Tom22. (A) Depletion of Tom22. Steady-state levels of Tom22 in total extracts of *mfb1Δ* cells containing pRS416-MFB1-3HA (TOM22) grown on dextrose media, or *tom22Δ* cells containing pRS314-MFB1-3HA and pGAL-TOM22 grown on galactose (Gal for expression) or dextrose media for 18 h (Dex for depletion). 3-PGK was monitored as a loading control. (B) Steady-state levels of Tom70 and Tom71 in mitochondria isolated from strains expressing Mfb1-3HA. Porin was monitored as a loading control. The Tom70 and Tom71 levels are not significantly altered in cells lacking Tom5 or Tom20, and depleting Tom22. (C) The cell homogenate (H) was separated into post-mitochondrial supernatant (PMS) and mitochondrial pellet (M). Porin and 3-PGK were monitored as mitochondria and cytoplasm markers, respectively. Arrows and asterisks indicate Mfb1 and non-specific bands, respectively. The upper bands of Mfb1 are posttranslationally modified species (Kondo-Okamoto *et al*, 2006).

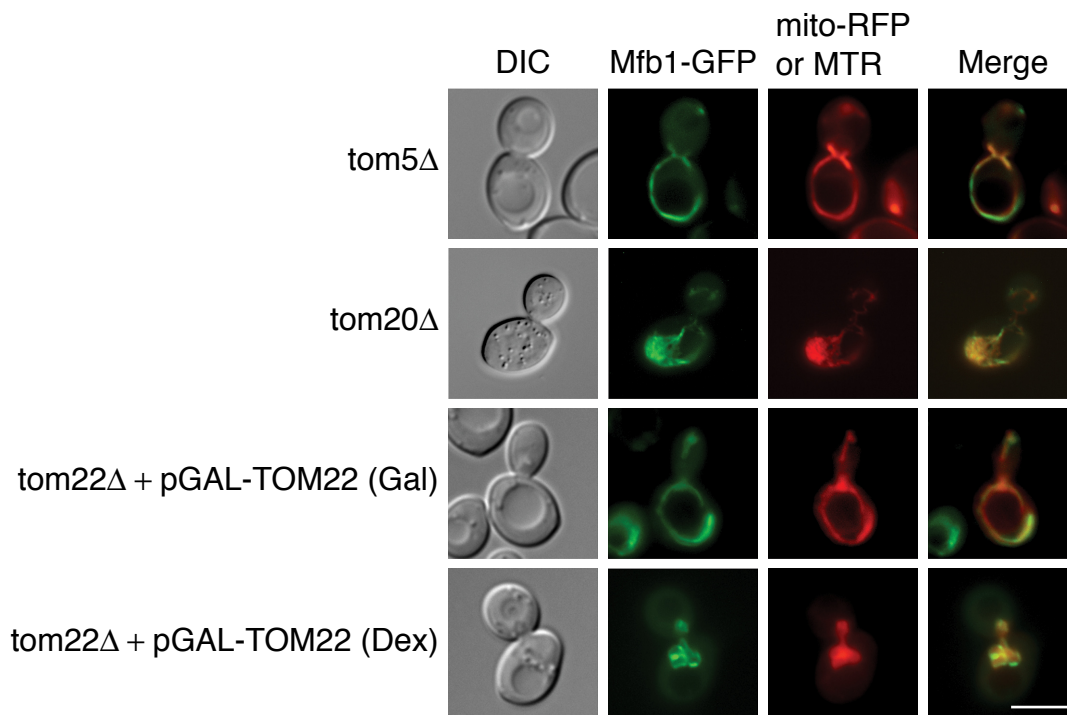

**Fig S2** | Mfb1 mitochondrial targeting is not disrupted in cells lacking Tom5 or Tom20, and depleting Tom22. Mfb1-GFP localization and mitochondria visualized by mito-RFP or MitoTracker Red (MTR) in *tom5Δ* or *tom20Δ* cells grown on dextrose media, and *tom22Δ* cells containing pGAL-TOM22 grown on galactose (Gal for expression) or dextrose media for 18 h (Dex for depletion). Representative images are shown. Bar, 5  $\mu$ m.

*mfb1* $\Delta$  *tom70* $\Delta$  *tom71* $\Delta$  + pRS416-MFB1-GFP

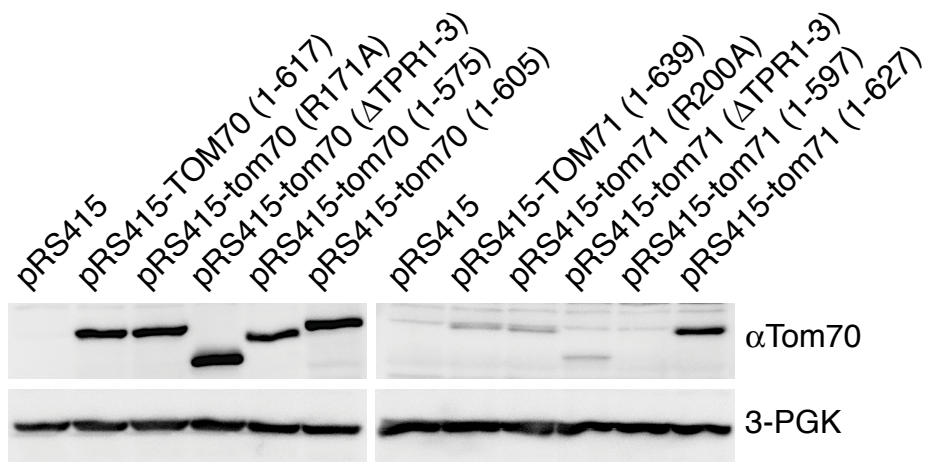

**Fig S3** | Steady-state levels of Tom70 and Tom71 wild-type and mutant proteins in total extracts of *mfb1* $\Delta$  *tom70* $\Delta$  *tom71* $\Delta$  cells containing pRS416-MFB1-GFP. 3-PGK was monitored as a loading control. Note that the Tom70 antibody cross-reacts with Tom71 wild-type and mutant proteins (two non-specific bands were seen due to long exposure for ECL detection). Tom71(1-597) was not stably expressed.
